# Supplementary material for: Tracking high-valent surface iron species in the oxygen evolution reaction on cobalt iron (oxy)hydroxides
Source: Royal Society of Chemistry journal article supplement (doi:10.1039/d1ee02999a), 2021-11-23
Supplement: d1ee02999a1.pdf [file d1ee02999a1.pdf]

## Supporting Information

### Tracking high-valent surface iron species in the oxygen evolution reaction on cobalt iron (oxy)hydroxides

Seunghwa Lee,<sup>a</sup> Aliko Moysiadou,<sup>a</sup> You-Chiuan Chu,<sup>b</sup> Hao Ming Chen,<sup>b</sup> Xile Hu<sup>a,\*</sup>

<sup>a</sup>Laboratory of Inorganic Synthesis and Catalysis, Institute of Chemical Sciences and Engineering, École Polytechnique Fédérale de Lausanne (EPFL), ISIC-LSCI, 1015 Lausanne, Switzerland

<sup>b</sup>Department of Chemistry, National Taiwan University, Taipei 10617, Taiwan

\* E-mail: [xile.hu@epfl.ch](mailto:xile.hu@epfl.ch)

**Table S1.** Elemental compositions of Co and Fe determined by ICP-OES.

| Elements |                       |           |           |
|----------|-----------------------|-----------|-----------|
| Samples  | Deposition time (sec) | Co (nmol) | Fe (nmol) |
| Fe 0%    | 40                    | 4.45±0.1  |           |
| Fe 3.3%  | 45                    | 4.2±0.12  | 0.14±0.15 |
| Fe 7.2%  | 50                    | 4.15±0.11 | 0.32±0.11 |
| Fe 15%   | 55                    | 3.82±0.1  | 0.65±0.13 |
| Fe 23%   | 60                    | 3.45±0.1  | 1.05±0.1  |
| Fe 30%   | 70                    | 3.1±0.08  | 1.35±0.11 |
| Fe 42%   | 70                    | 2.55±0.11 | 1.83±0.14 |

**Table S2.** Elemental compositions of Co and Fe of CoFeO<sub>x</sub>H<sub>y</sub> films at an Fe content of 30% as determined by ICP-OES.

| Elements              |           |           |
|-----------------------|-----------|-----------|
| Deposition time (min) | Co (nmol) | Fe (nmol) |
| 1                     | 3.0       | 1.3       |
| 2                     | 6.1       | 2.75      |
| 3                     | 9.15      | 3.92      |
| 4.5                   | 13.63     | 5.62      |
| 6                     | 18.42     | 8.12      |

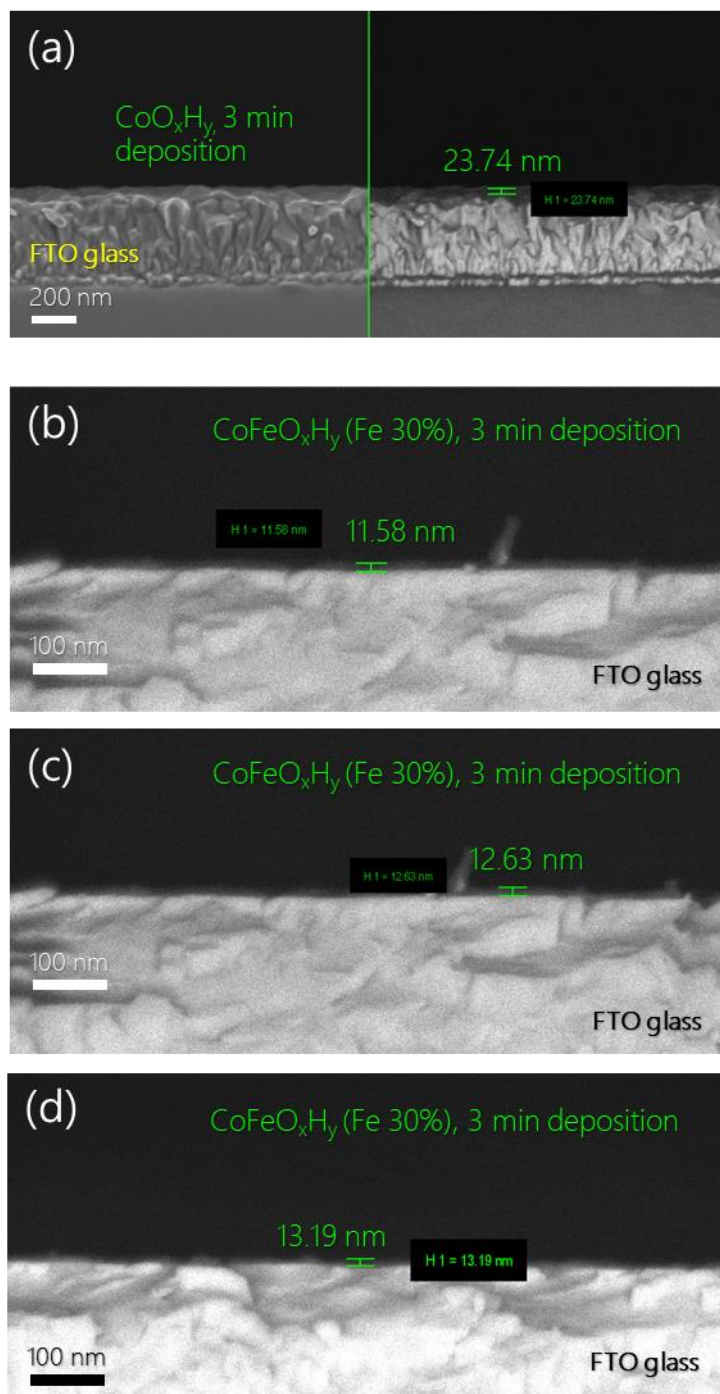

**Figure S1.** SEM images of  $\text{CoO}_x\text{H}_y$  and  $\text{CoFeO}_x\text{H}_y$  (Fe 30%) samples: Side view images of (a)  $\text{CoO}_x\text{H}_y$  and (b-d)  $\text{CoFeO}_x\text{H}_y$  films anodically deposited at  $55.6 \mu\text{A cm}^{-2}$  for 3 min. The different thickness between the two samples suggests that the deposition rate is dependent of electrolyte compositions. Hence, we applied different deposition times for the preparation of samples with different Fe contents.

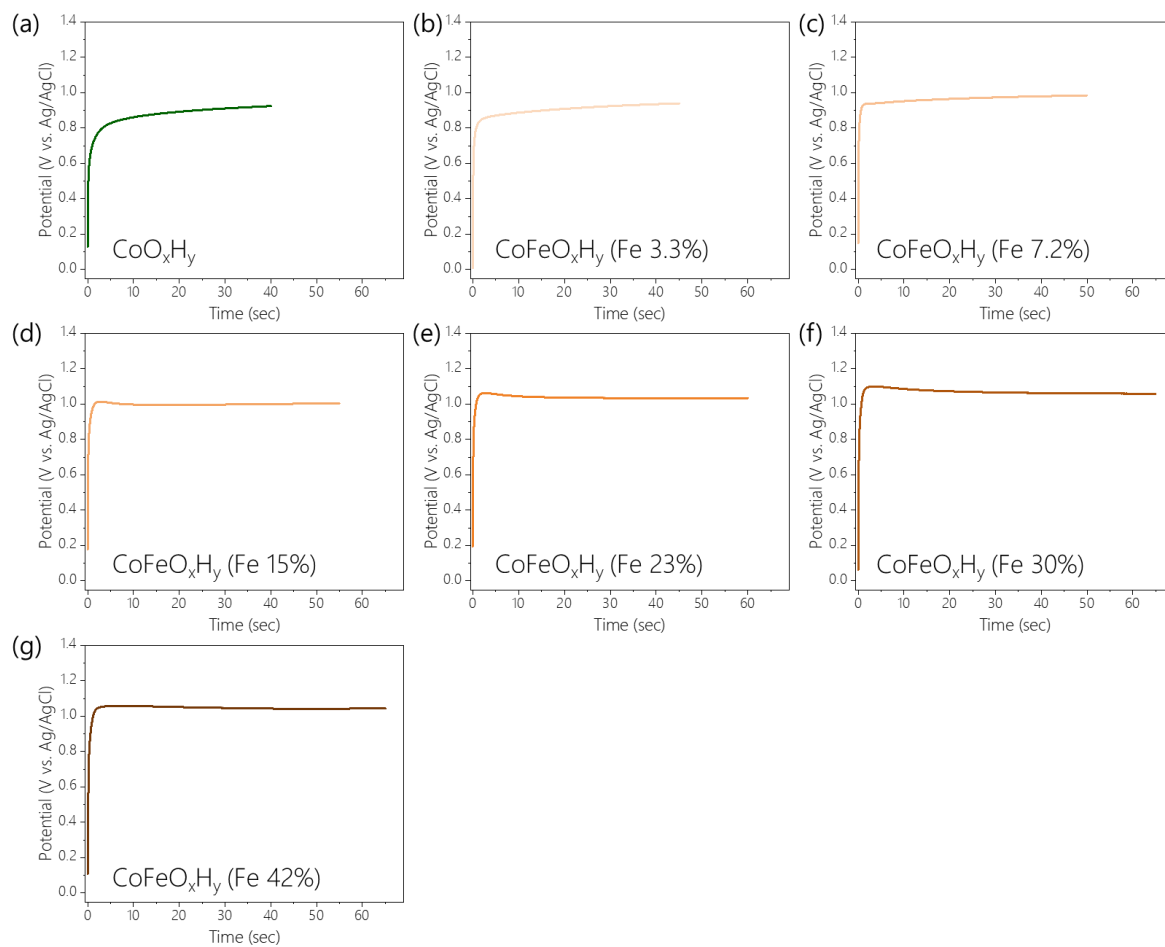

**Figure S2.** Potential profiles of the samples versus deposition time at a constant anodic current density of  $55.6 \mu\text{A cm}^{-2}$ .

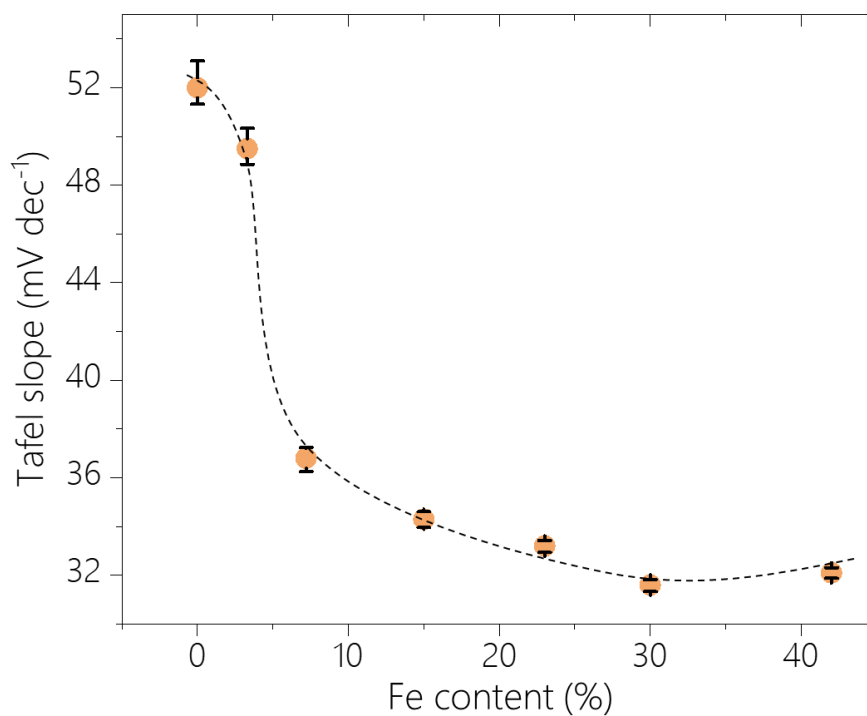

**Figure S3.** Comparison of Tafel slopes for the CoFeO<sub>x</sub>H<sub>y</sub> samples with different Fe contents.

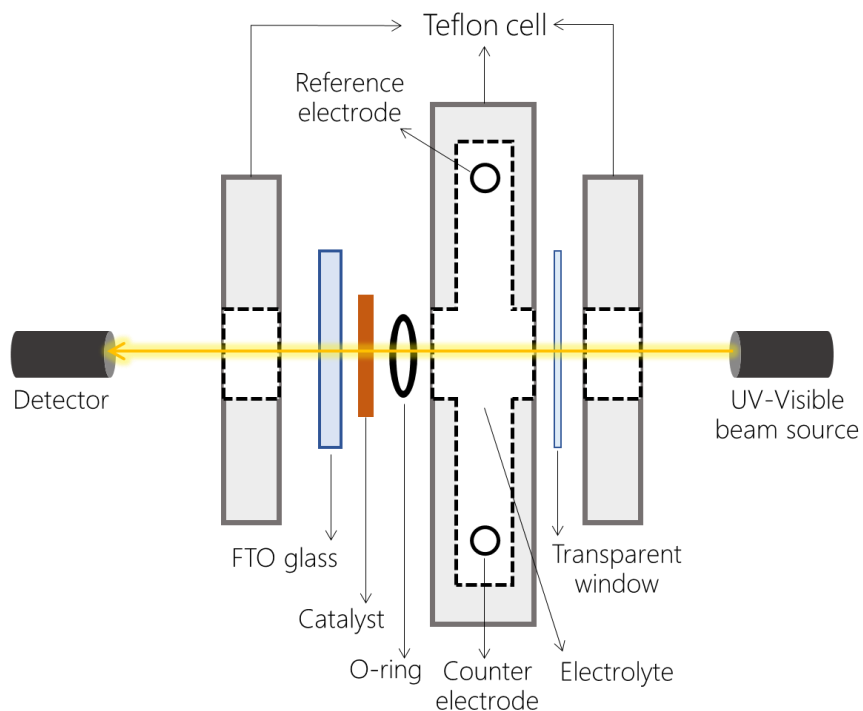

**Figure S4.** Scheme (top view) of a customized cell for the operando UV-Vis spectroscopy study.

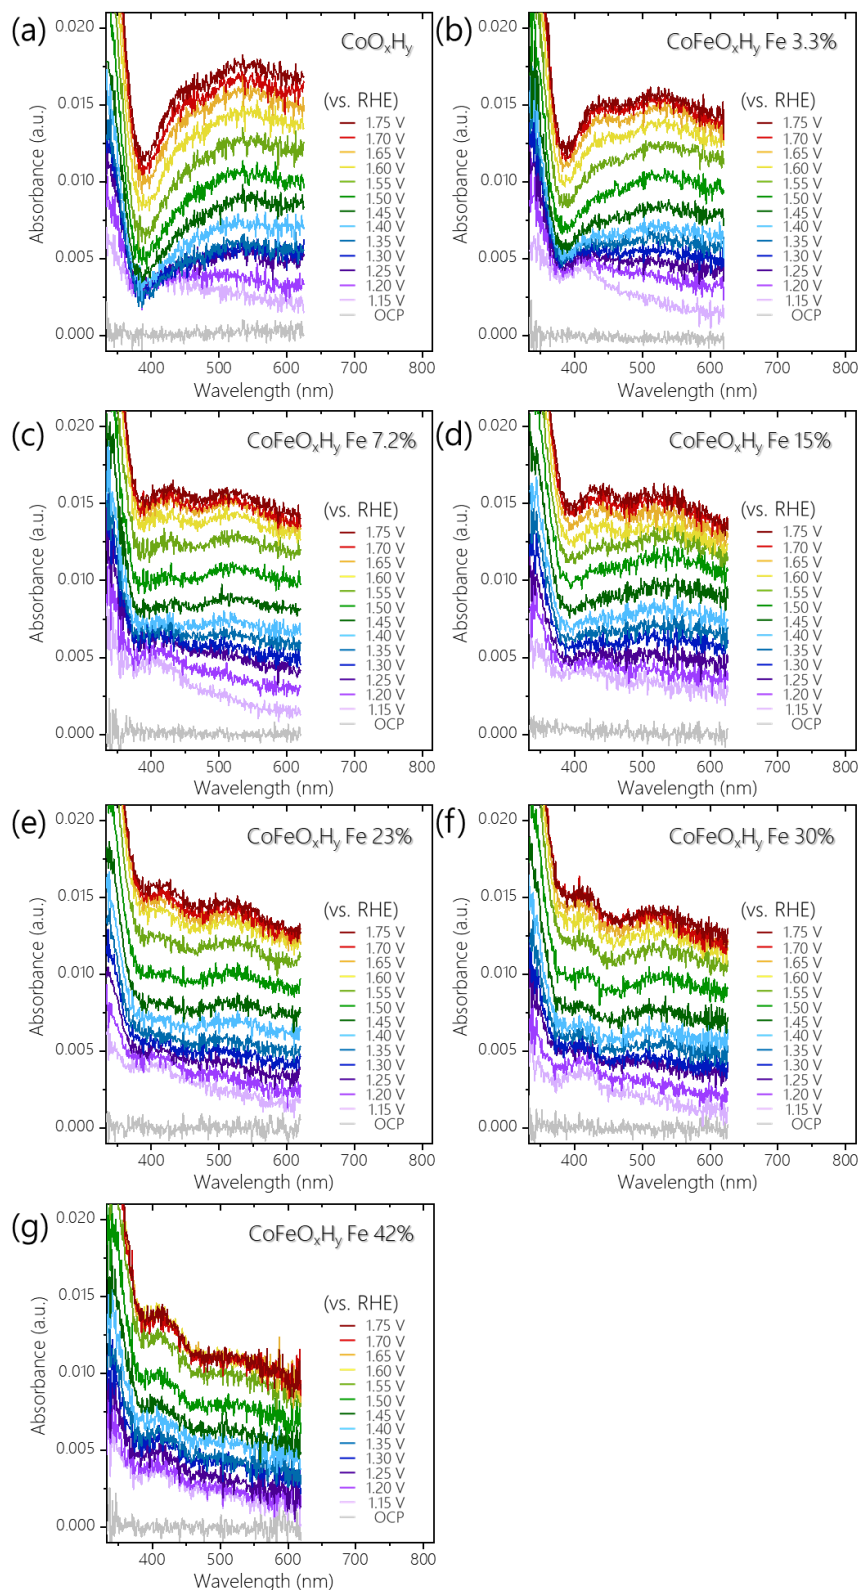

**Figure S5.** Operando UV-Vis spectra of  $\text{CoO}_x\text{H}_y$  and  $\text{CoFeO}_x\text{H}_y$  films (a-g). The spectra were obtained at each constant potential in 0.1 M Fe-free KOH from OCP to 1.75 V with an interval of 0.05 V.

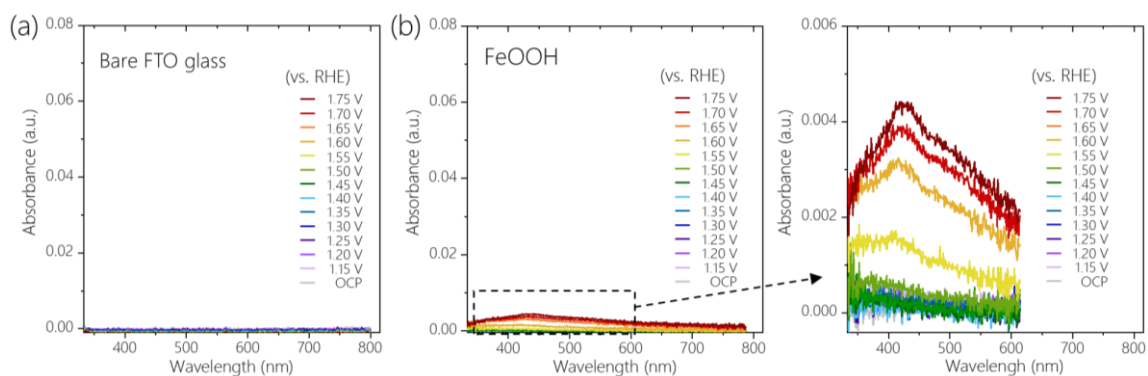

**Figure S6.** Operando UV-Vis spectra of (a) bare FTO glass and (b) FeOOH obtained at each constant potential in 0.1 M Fe-free KOH from OCP to 1.75 V with an interval of 0.05 V.

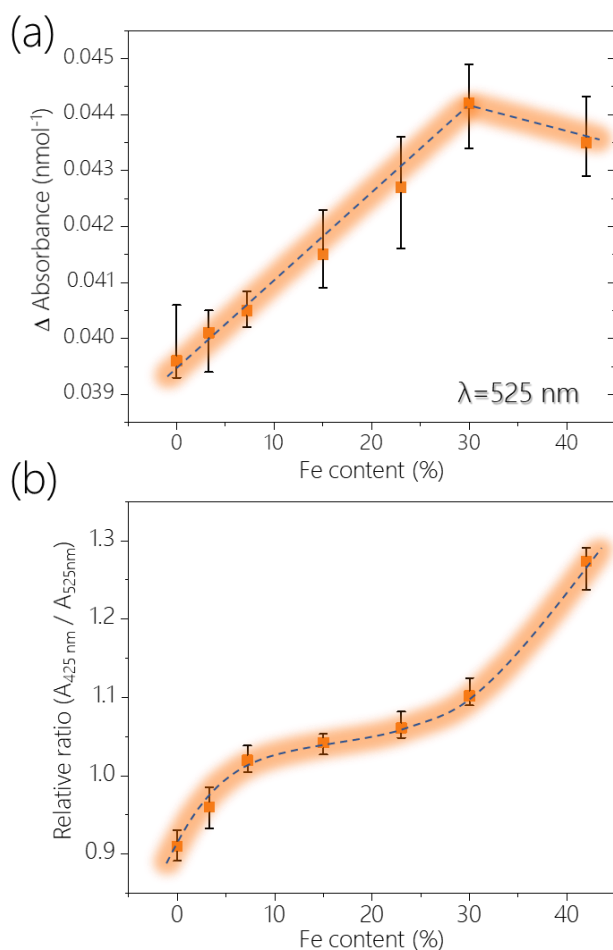

**Figure S7.** (a) Differential absorbance of the peak at 525 nm between OCP and 1.75 V for CoFeO<sub>x</sub>H<sub>y</sub> with different Fe content. (b) Relative intensity ratio of the peaks at 425 nm and 525 nm in CoFeO<sub>x</sub>H<sub>y</sub> samples with different Fe content.

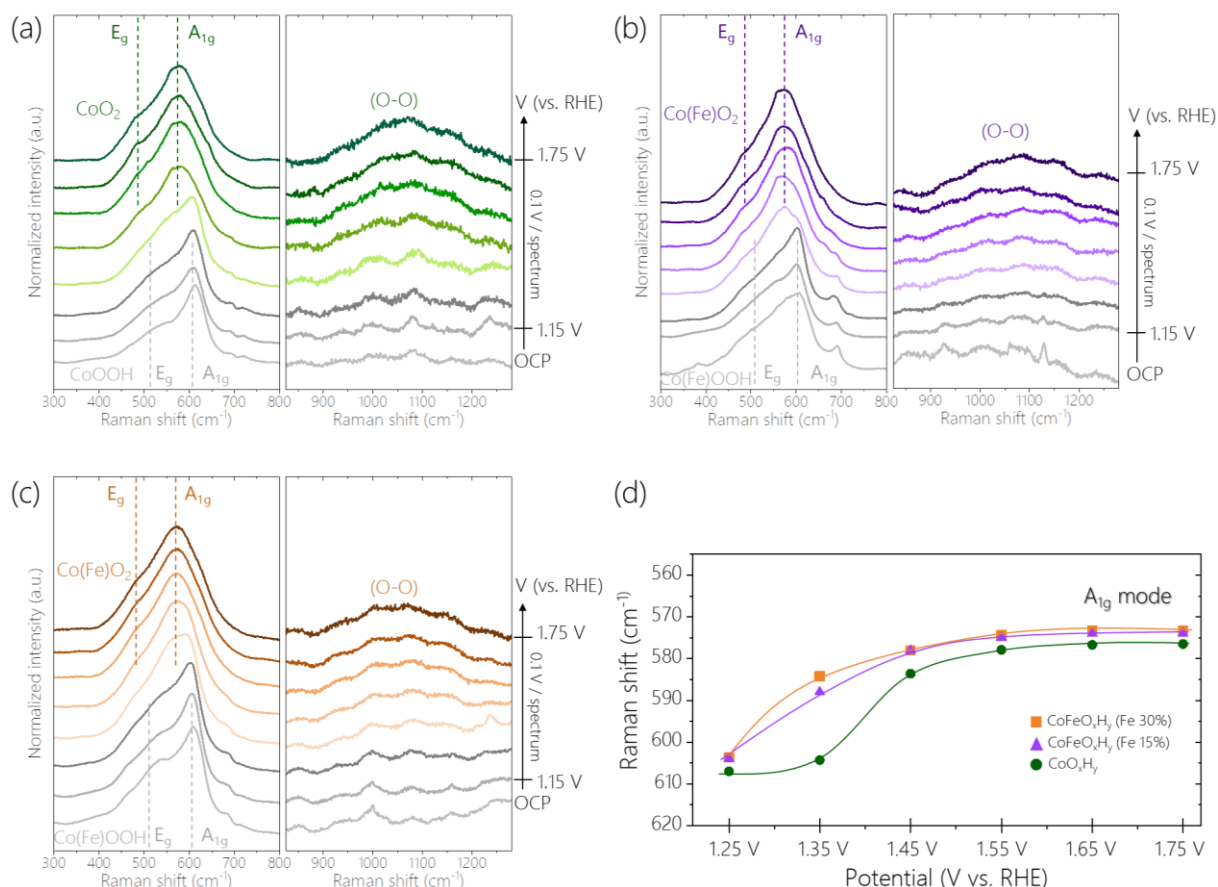

**Figure S8.** Operando Raman spectra of (a)  $\text{CoO}_x\text{H}_y$  and  $\text{CoFeO}_x\text{H}_y$  containing (b) 15% Fe and (c) 30% Fe at increasing applied potentials from OCP to 1.75 V (0.1 V per step) in 0.1 M Fe-free KOH solutions. (d) Comparison of potential dependent peak positions of the  $A_{1g}$  mode corresponding to Co–O stretching bond.

For all samples at OCP, two main peaks corresponding to  $E_g$  (at ca.  $505\text{ cm}^{-1}$ ) and  $A_{1g}$  (at ca.  $605\text{ cm}^{-1}$ ) vibrational modes of Co–O bonds in  $\text{CoOOH}$  were observed (Figure S8), consistent with a previous study.<sup>1</sup> With increasing applied potentials, these two peaks shifted to lower frequencies, indicating gradual oxidation of  $\text{Co}^{3+}$  to  $\text{Co}^{4+}$ . The peaks stabilized at ca.  $475\text{ cm}^{-1}$  and ca.  $575\text{ cm}^{-1}$ , corresponding to  $E_g$  and  $A_{1g}$  modes of  $\text{Co(Fe)O}_2$  respectively. To probe Fe-dependent enhancement of Co oxidation to  $\text{Co}^{4+}$ , we compared peak positions of the  $A_{1g}$  mode of Co–O for all three samples as function of potential (Figure S8d). The shift occurred at potentials in the order  $\text{CoFeO}_x\text{H}_y$  (30% Fe) <  $\text{CoFeO}_x\text{H}_y$  (15% Fe) <  $\text{CoO}_x\text{H}_y$ . This result shows Fe promotes the oxidation of  $\text{Co}^{3+}$  to  $\text{Co}^{4+}$ .

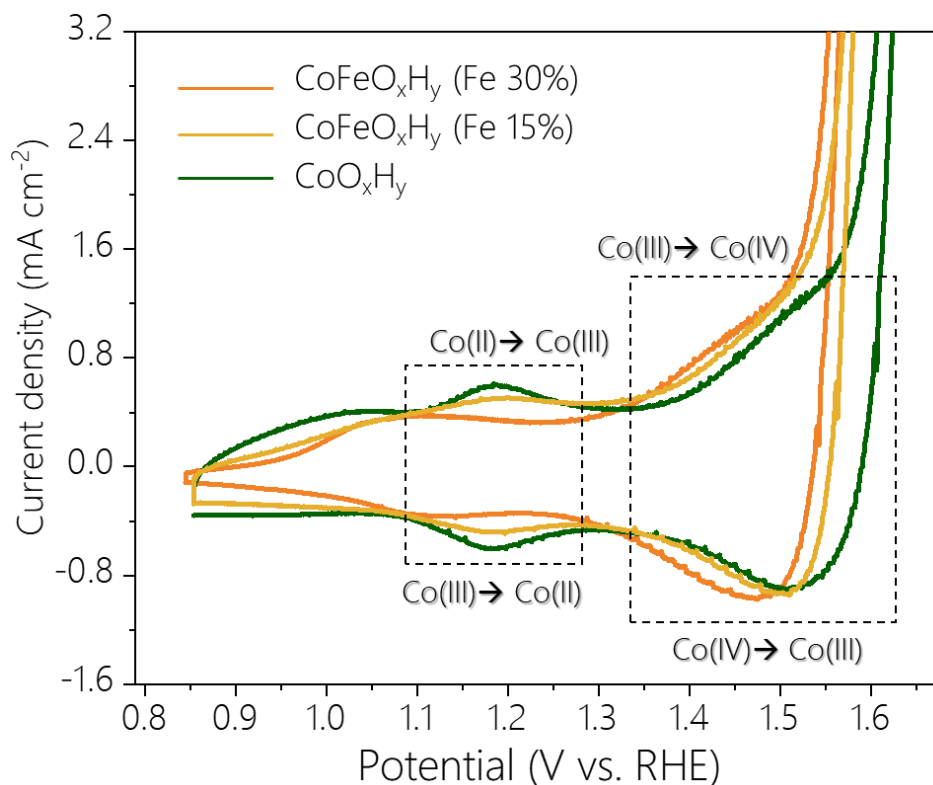

**Figure S9.** Cyclic voltammograms of  $\text{CoFeO}_x\text{H}_y$  samples containing 0%, 15% and 30% Fe obtained at a scan rate of  $100 \text{ mV s}^{-1}$  in 0.1 M Fe-free KOH electrolyte.

At around 1.2 V, the pairs of redox events are attributed to the  $\text{Co}^{2+}/\text{Co}^{3+}$  redox couple.<sup>1-3</sup> The second redox events in 1.4 V to 1.55 V are assigned to the  $\text{Co}^{3+}/\text{Co}^{4+}$  redox couple.<sup>1, 2</sup> The onset potentials for the oxidation to  $\text{Co}^{4+}$  depend on the Fe content. The more Fe is added, the earlier the  $\text{Co}^{3+}$  is oxidized.

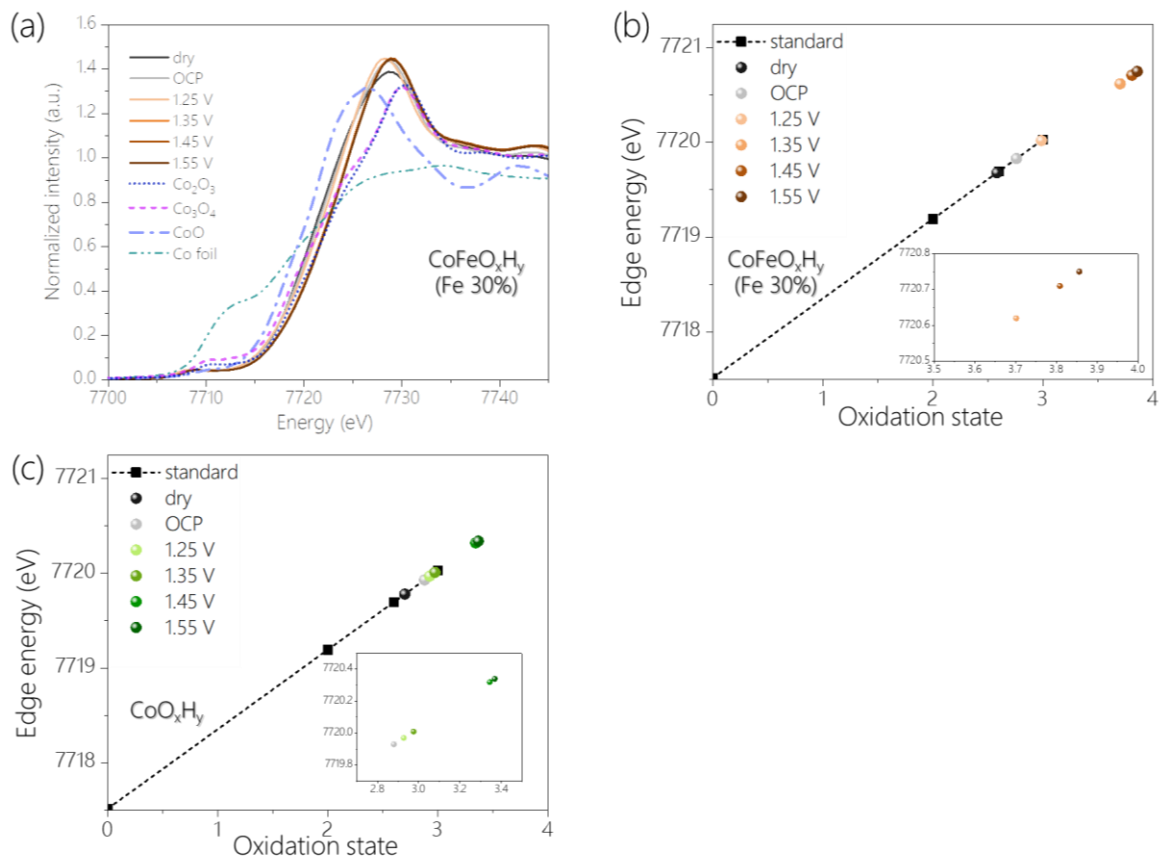

**Figure S10.** (a) XANES spectra of CoFeO<sub>x</sub>H<sub>y</sub> (30%Fe) for Co K-edge at various potentials; reference spectra include those of Co foil, CoO, Co<sub>3</sub>O<sub>4</sub>, and Co<sub>2</sub>O<sub>3</sub>. (b) The corresponding linear fit of Co oxidation state for CoFeO<sub>x</sub>H<sub>y</sub>. (c) Reproduced data of Co oxidation state for CoO<sub>x</sub>H<sub>y</sub> as reported earlier.<sup>1</sup>

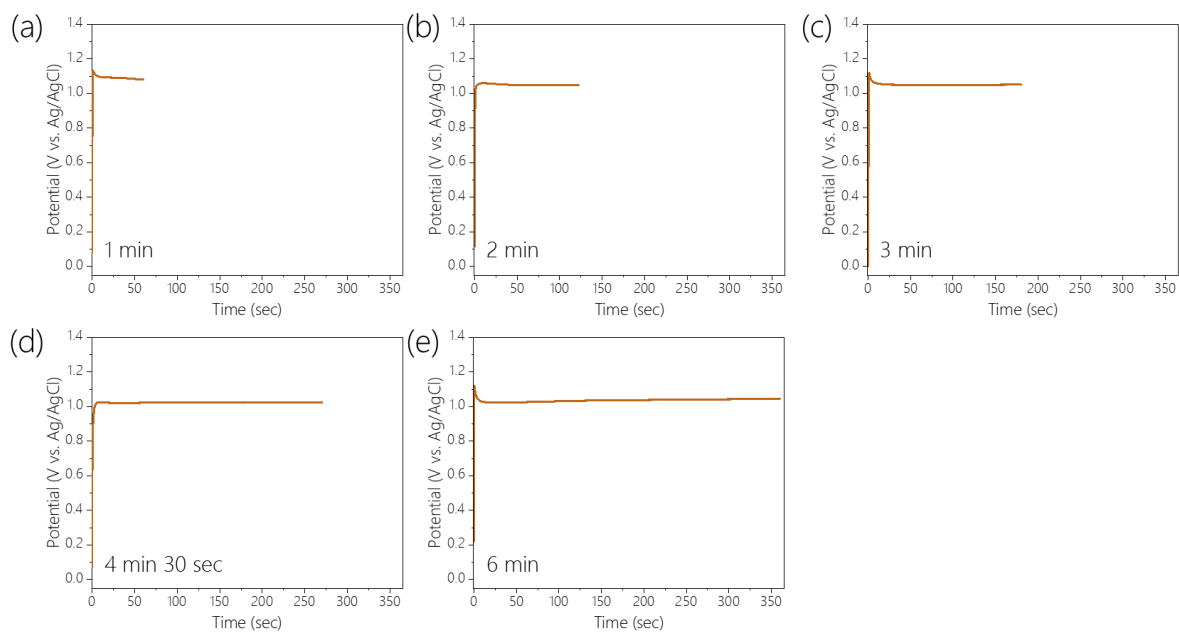

**Figure S11.** Potential profiles of the CoFeO<sub>x</sub>H<sub>y</sub> films (Fe 30%) at a constant anodic current density of 55.6  $\mu\text{A cm}^{-2}$ .

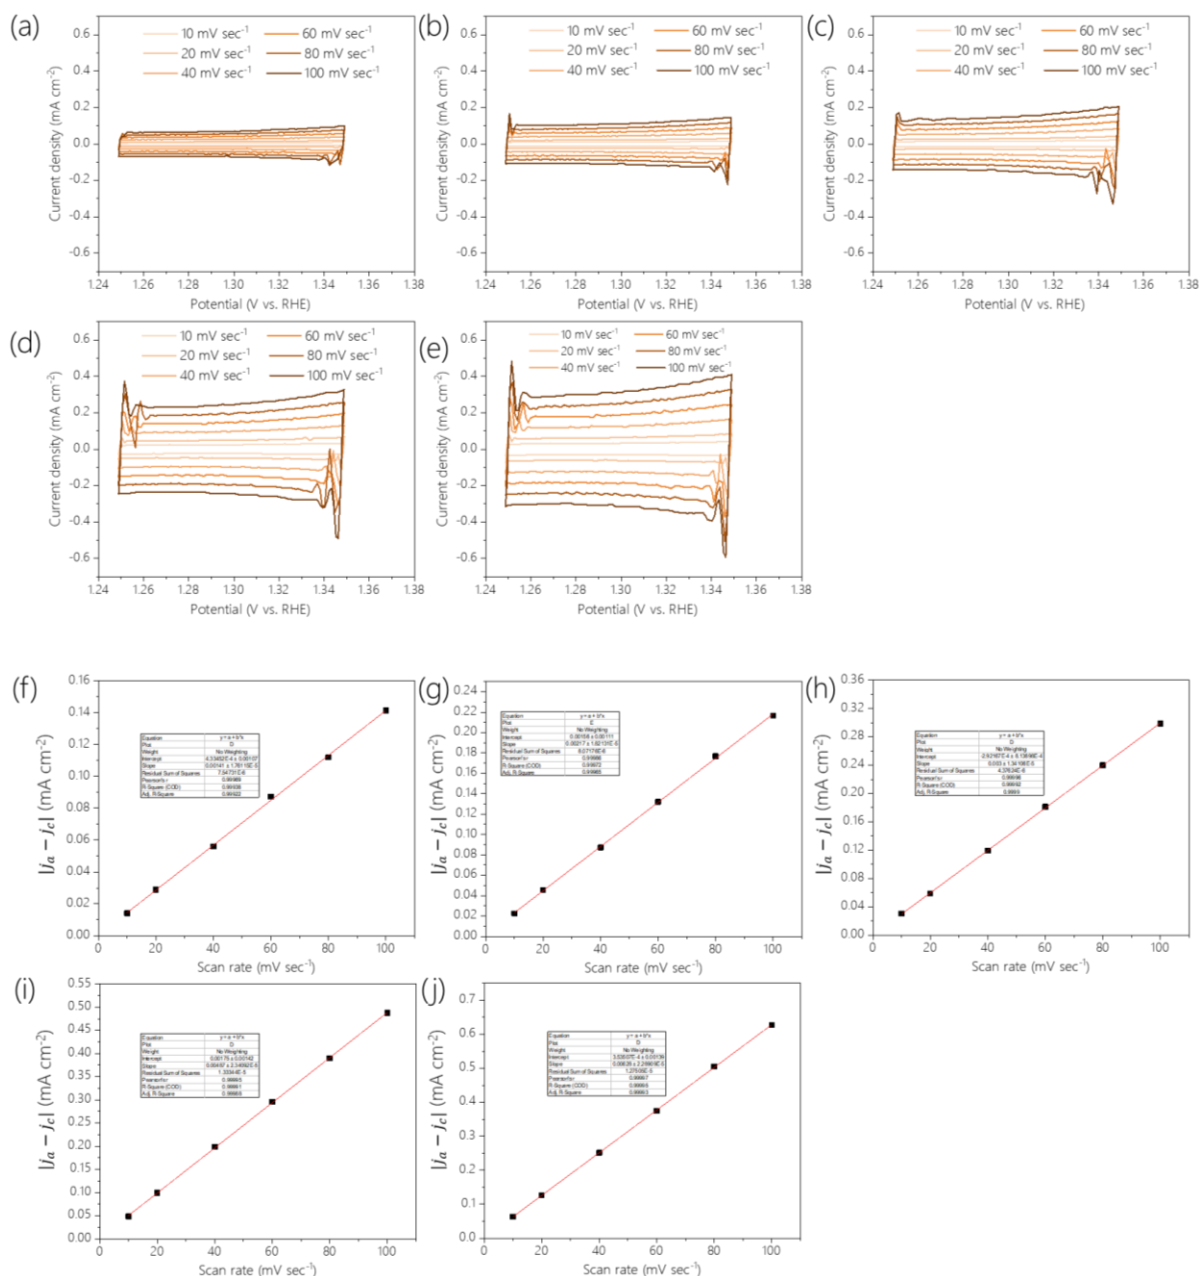

**Figure S12.** Cyclic voltammograms of the CoFeO<sub>x</sub>H<sub>y</sub> (Fe 30%) deposited for (a) 1 min, (b) 2 min, (c) 3 min, (d) 4 min 30 sec and (e) 6 min respectively, acquired in 0.1 M Fe-free KOH solutions at different scan rates (10, 20, 40, 60, 80, 100 mV sec<sup>-1</sup>) for the determination of the C<sub>dl</sub>. (f-j) Plots of the corresponding differences of the anodic and cathodic current densities,  $\Delta j = |j_a - j_c|$ , versus the scan rate (10, 20, 40, 60, 80, 100 mV sec<sup>-1</sup>).

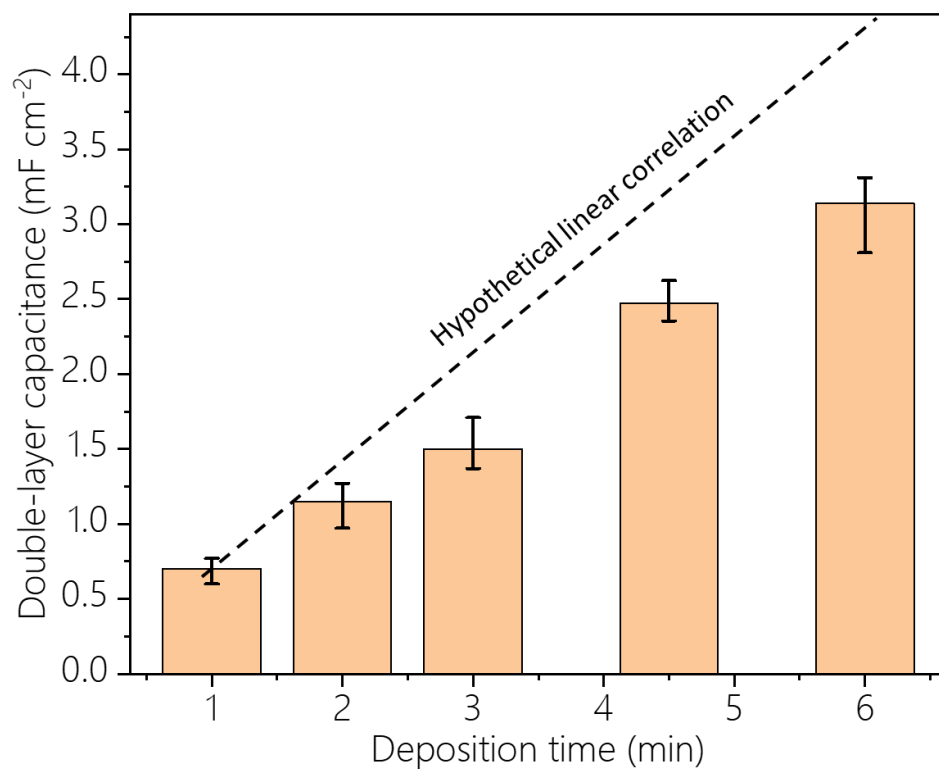

**Figure S13.** Comparison of double-layer capacitances ( $C_{dl}$ ) for the  $\text{CoFeO}_x\text{H}_y$  (30%Fe) samples deposited at given deposition times. The  $C_{dl}$  gradually deviates from the linear correlation with increasing film thickness.

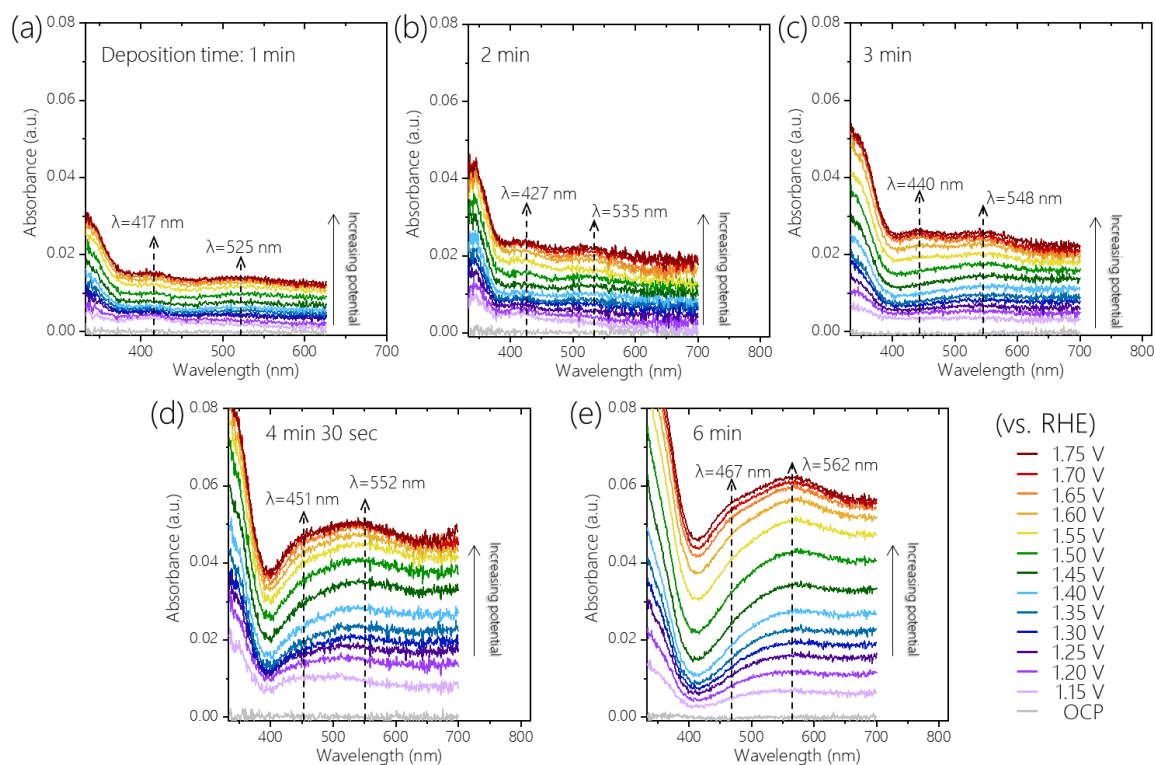

**Figure S14.** Operando UV-Vis spectra of the  $\text{CoFeO}_x\text{H}_y$  films (30%Fe) deposited for (a) 1 min, (b) 2 min, (c) 3 min, (d) 4 min 30 sec and (e) 6 min. The spectra were obtained at each constant potential in 0.1 M Fe-free KOH solutions from OCP to 1.75 V with an interval of 0.05 V.

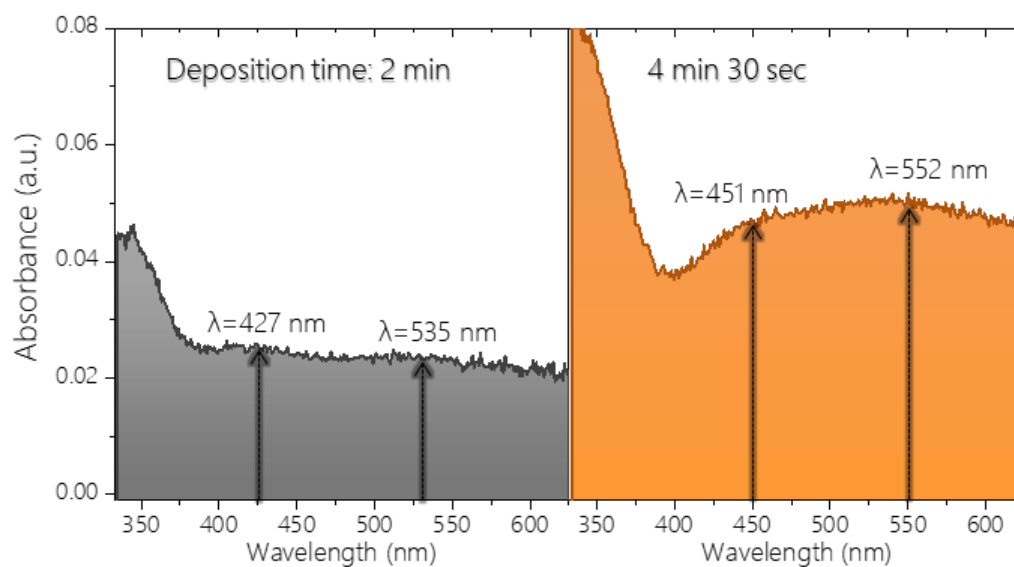

**Figure S15.** Operando UV-Vis spectra of  $\text{CoFeO}_x\text{H}_y$  (30% Fe) films prepared at various deposition durations such as (left) 2 min and (right) 4 min 30 sec at 1.75 V (vs. RHE).

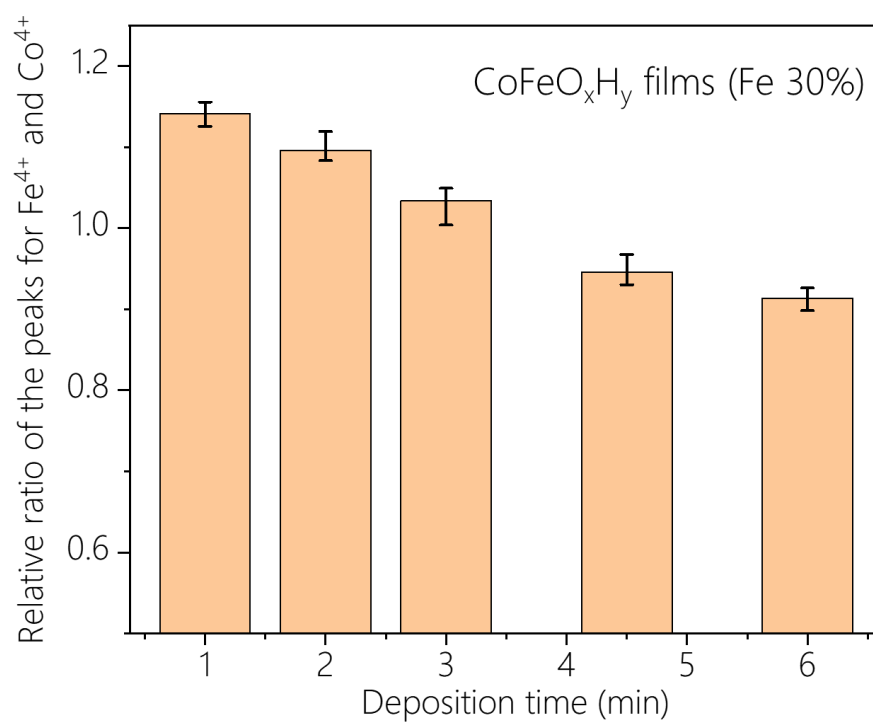

**Figure S16.** Comparison of relative ratio of the peak intensities associated with the Fe<sup>4+</sup> and Co<sup>4+</sup> for the CoFeO<sub>x</sub>H<sub>y</sub> (30%Fe) samples. The spectra were collected at 1.75 V in 0.1 M Fe-free KOH solutions.

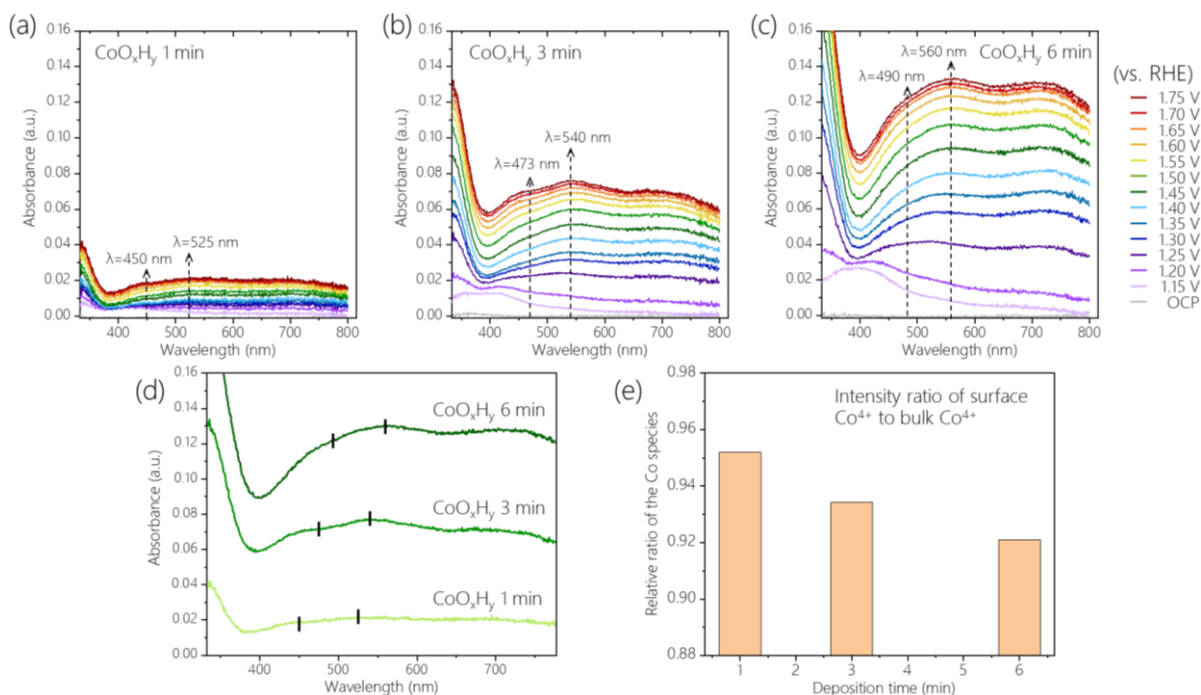

**Figure S17.** Operando UV-Vis spectra of the CoO<sub>x</sub>H<sub>y</sub> films deposited for (a) 1 min, (b) 3 min and (c) 6 min. (d) The representative spectra of the different CoO<sub>x</sub>H<sub>y</sub> films at 1.75 V. (e) Comparison of relative ratio of the peak intensities associated with the active Co species (450-490 nm) and Co<sup>4+</sup> distributed in the entire bulk (525-560 nm) for CoO<sub>x</sub>H<sub>y</sub> samples with different thicknesses (deposition times). The spectra were collected at each constant potential in 0.1 M Fe-free KOH solutions from OCP to 1.75 V with an interval of 0.05 V.

For different CoO<sub>x</sub>H<sub>y</sub> films, two pronounced features were observed. The peaks assigned to high-valent Co species at the surface and Co<sup>4+</sup> in the entire bulk shifted to higher wavelengths with increasing film thickness. The intensity ratio of the two Co species (e.g.,  $A_{450\text{nm}}/A_{525\text{nm}}$  for the 1 min-deposited sample) decreased upon increasing thickness. The result indicates that the proportion of high-valent Co species at lower wavelengths decreases as the film gets thicker, while the proportion of the Co<sup>4+</sup> at higher wavelengths increases. This result is similar to the comparison of Fe<sup>4+</sup> and Co<sup>4+</sup> species in CoFeO<sub>x</sub>H<sub>y</sub>. Together, they support that the Co<sup>4+</sup> species associated with the peak at higher wavelengths (i.e., 525 nm, 540 nm and 560 nm) is throughout the entire bulk.

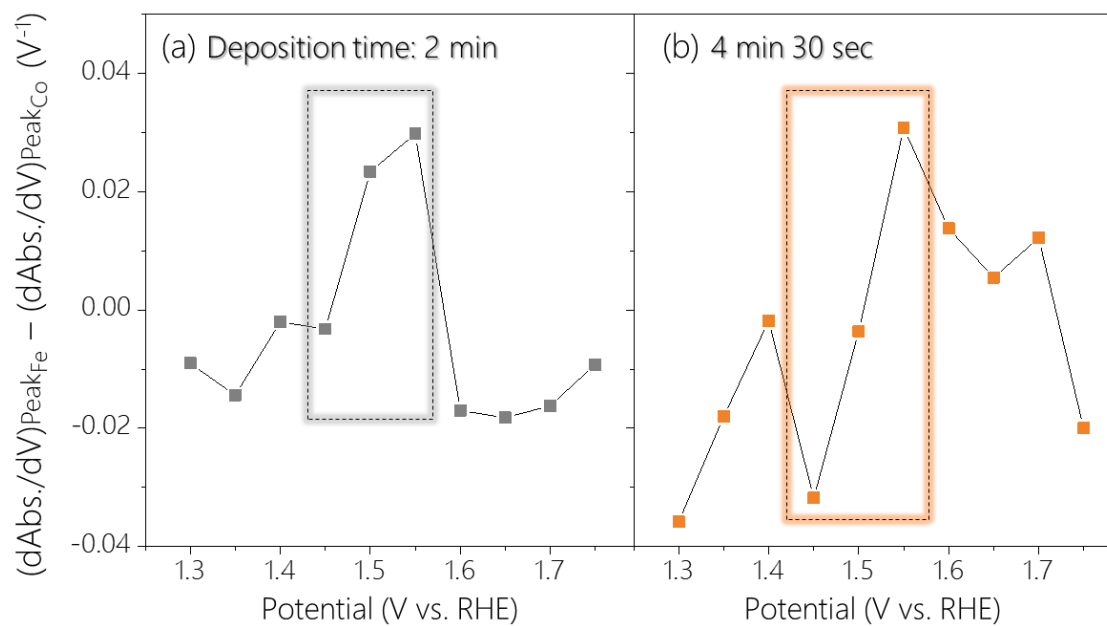

**Figure S18.** Difference in differential absorbance between the peaks of  $\text{Fe}^{4+}$  and  $\text{Co}^{4+}$  for  $\text{CoFeO}_x\text{H}_y$  samples (30%Fe) deposited for (a) 2 min and (b) 4 min 30 sec, respectively.

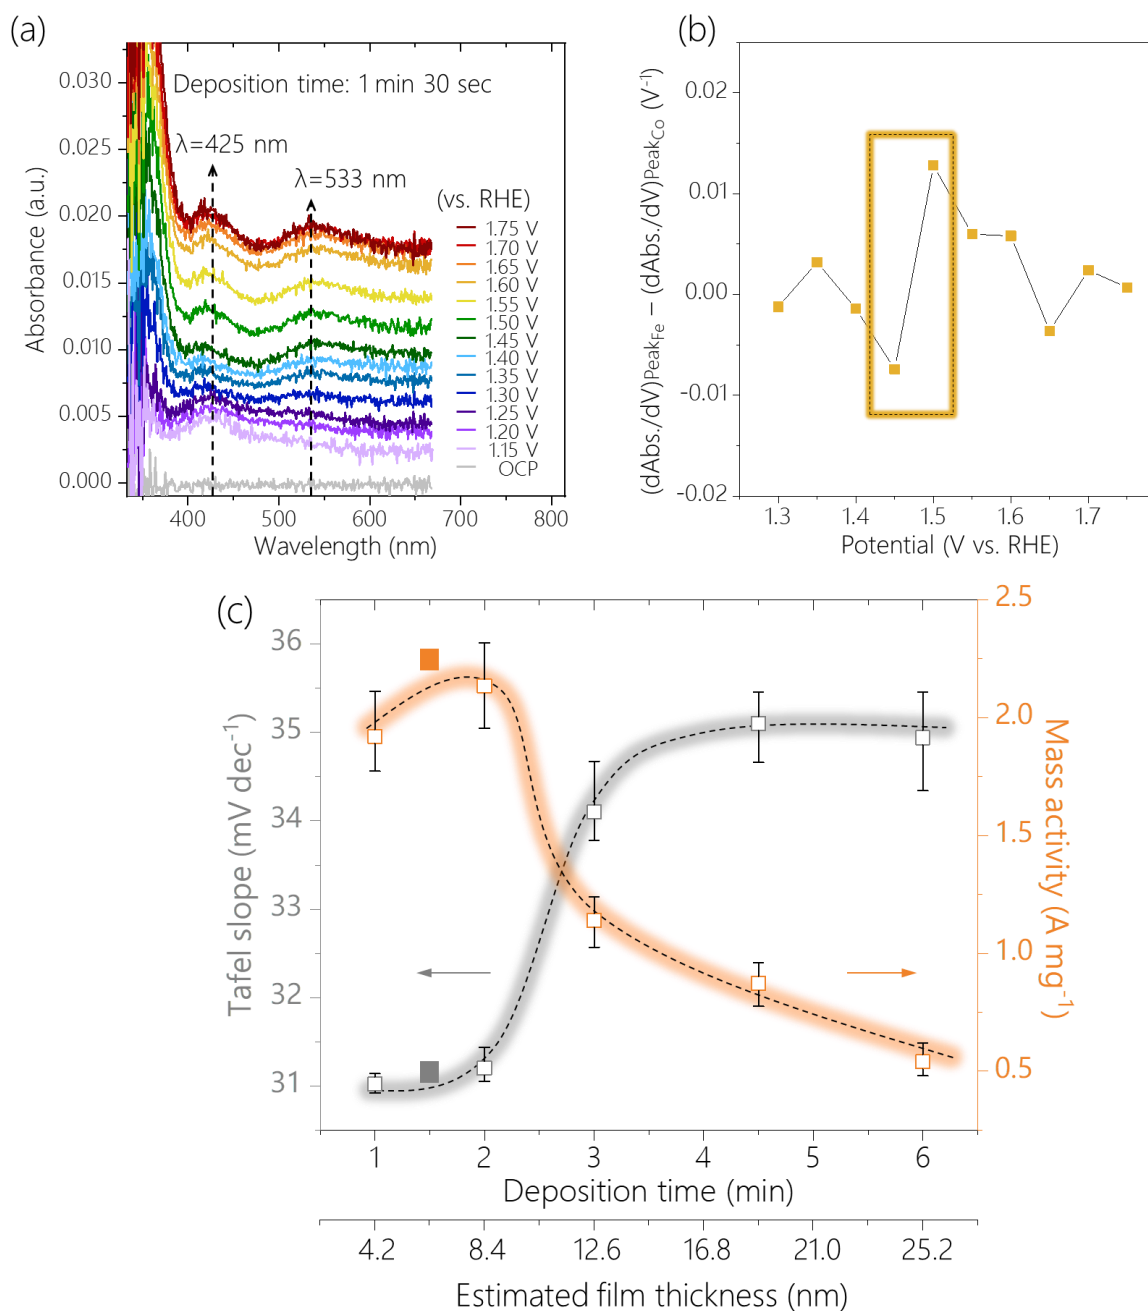

**Figure S19.** Experimental results obtained from CoFeO<sub>x</sub>H<sub>y</sub> (30%Fe) film deposited for 1 min 30 sec. (a) Operando UV-Vis spectra recorded from OCP to 1.75 V with 0.05 V per step. (b) Difference in differential absorbance between the peaks of Fe<sup>4+</sup> and Co<sup>4+</sup>, derived from Figure S14a. (c) Comparison of Tafel slope and mass activity (at an overpotential of 340 mV) as function of deposition time and estimated film thickness, to which the data for the 1 min 30 sec deposited-sample are added.

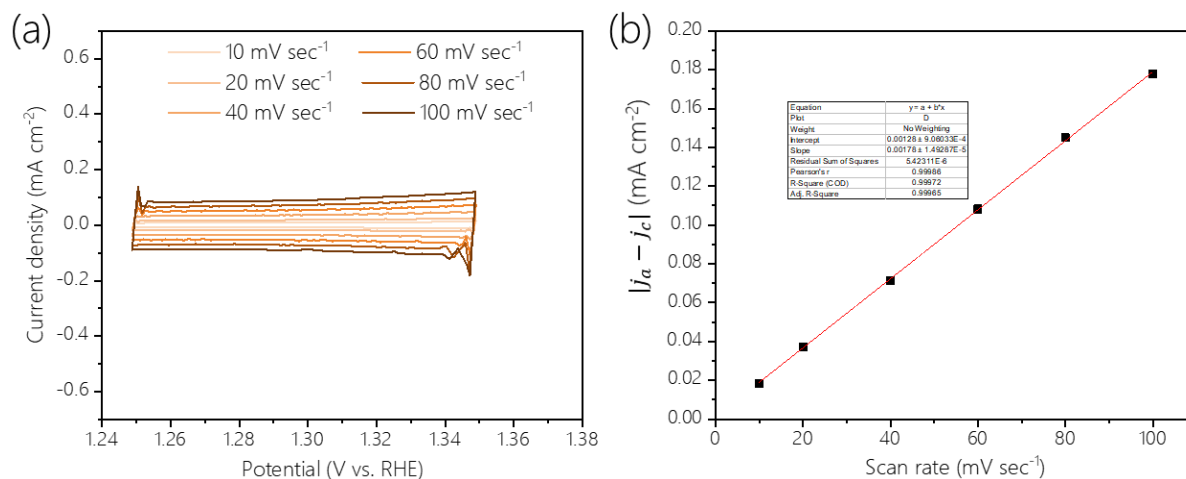

**Figure S20.** (a) Cyclic voltammograms of CoFeO<sub>x</sub>H<sub>y</sub> (30%Fe) deposited for 1 min 30 sec acquired in 0.1 M Fe-free KOH solutions at different scan rates (10, 20, 40, 60, 80, 100 mV sec<sup>-1</sup>) for the determination of the  $C_{dl}$ . (b) A plot of the corresponding differences of the anodic and cathodic current densities,  $\Delta j = |j_a - j_c|$ , versus the scan rate (10, 20, 40, 60, 80, 100 mV sec<sup>-1</sup>). The resulting  $C_{dl}$  was 0.89 mF cm<sup>-2</sup>.

## Appendix 1. Differentiating bulk and surface species in $\text{Co(Fe)O}_x\text{H}_y$ catalysts

We plotted  $\log(\text{current density})$  versus normalized absorbance of the peaks at 450 nm for  $\text{CoO}_x\text{H}_y$  and 425 nm for  $\text{CoFeO}_x\text{H}_y$  (Fe 30%) (Figure 3). They are assumed to represent the accumulation of high-valent, catalytically active Co (e.g.,  $\text{Co}^{4+}\text{-O}\cdot\text{-Co}^{4+}$ ) and Fe ( $\text{Fe}^{4+}$ ) species respectively. The concentration of  $\text{Co}^{4+}\text{-O}\cdot\text{-Co}^{4+}$  and  $\text{Fe}^{4+}$  scales with the corresponding  $\log(\text{current density})$ , suggestion that they are active species for  $\text{CoO}_x\text{H}_y$  and  $\text{CoFeO}_x\text{H}_y$ , respectively. In contrast, the change in absorbance at 525 nm (assigned to  $\text{Co}^{4+}$  in the bulk) for both samples does not scale with the OER activity, suggesting that this species is not the active species. At Fe contents higher than 3.3%, the peak for  $\text{Co}^{4+}\text{-O}\cdot\text{-Co}^{4+}$  (450 nm) is no longer observed during OER (Figures 2c and S5). The results indicate a change of active sites from  $\text{CoO}_x\text{H}_y$  to  $\text{CoFeO}_x\text{H}_y$ .

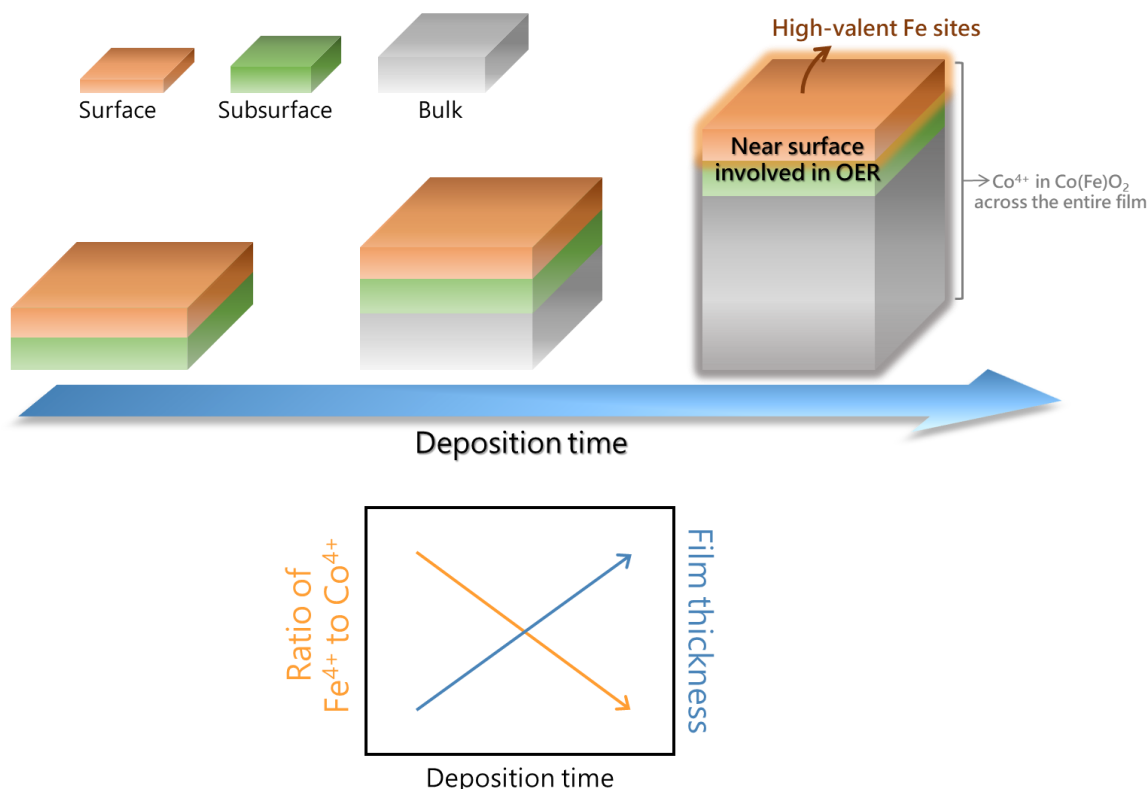

**Scheme S1.** Testing the hypothesis that  $\text{Fe}^{4+}$  sites are at the surface by studying films of different thickness

The ratio of surface sites versus bulk sites will decrease with increasing film thickness (Scheme S1). If the  $\text{Fe}^{4+}$  active sites in  $\text{CoFeO}_x\text{H}_y$  are at the surface, and the  $\text{Co}^{4+}$  sites are in the bulk, then the intensity of the peaks corresponding to  $\text{Fe}^{4+}$  (425 nm) and  $\text{Co}^{4+}$  (525 nm) will decrease with increasing film thickness. Concomitantly the

metal mass-based OER activity will decrease. If both sites are in the bulk, or both sites are on the surface, then the ratio should be constant. If  $\text{Fe}^{4+}$  active sites are in the bulk and  $\text{Co}^{4+}$  sites are on the surface, then the ratio would increase with increasing film thickness.

We found that with increasing in film thickness, the ratio of the absorption intensities for the  $\text{Fe}^{4+}$  and  $\text{Co}^{4+}$  (e.g.,  $A_{417\text{nm}}/A_{525\text{nm}}$  for the 1 min-deposited sample) at 1.75 V gradually decreased (Figure S16) when the thickness was increased. The metal mass-based OER activity also decreased with increasing film thickness (Figure 4c). These results can only be explained if we consider the  $\text{Fe}^{4+}$  active sites in  $\text{CoFeO}_x\text{H}_y$  are at the surface, and the  $\text{Co}^{4+}$  sites are in the bulk. The result is consistent with previous studies that showed that OER catalysis was often limited to near surface sites.<sup>4-8</sup>

## References

1. A. Moysiadou, S. Lee, C.-S. Hsu, H. M. Chen and X. Hu, *J. Am. Chem. Soc.*, 2020, **142**, 11901-11914.
2. J. A. Koza, Z. He, A. S. Miller and J. A. Switzer, *Chem. Mater.*, 2012, **24**, 3567-3573.
3. M. S. Burke, M. G. Kast, L. Trotochaud, A. M. Smith and S. W. Boettcher, *J. Am. Chem. Soc.*, 2015, **137**, 3638-3648.
4. S. Corby, M.-G. Tecedor, S. Tengeler, C. Steinert, B. Moss, C. A. Mesa, H. F. Heiba, A. A. Wilson, B. Kaiser, W. Jaegermann, L. Francàs, S. Gimenez and J. R. Durrant, *Sustain. Energy Fuels*, 2020, **4**, 5024-5030.
5. H. N. Nong, L. J. Falling, A. Bergmann, M. Klingenhof, H. P. Tran, C. Spöri, R. Mom, J. Timoshenko, G. Zichittella, A. Knop-Gericke, S. Piccinin, J. Pérez-Ramírez, B. R. Cuenya, R. Schlögl, P. Strasser, D. Teschner and T. E. Jones, *Nature*, 2020, **587**, 408-413.
6. C. Roy, B. Sebok, S. B. Scott, E. M. Fiordaliso, J. E. Sørensen, A. Bodin, D. B. Trimarco, C. D. Damsgaard, P. C. K. Vesborg, O. Hansen, I. E. L. Stephens, J. Kibsgaard and I. Chorkendorff, *Nat. Catal.*, 2018, **1**, 820-829.
7. B. S. Yeo and A. T. Bell, *J. Am. Chem. Soc.*, 2011, **133**, 5587-5593.
8. C. Baeumer, J. Li, Q. Lu, A. Y.-L. Liang, L. Jin, H. P. Martins, T. Duchoň, M. Glöß, S. M. Gericke, M. A. Wohlgemuth, M. Giesen, E. E. Penn, R. Dittmann, F. Gunkel, R. Waser, M. Bajdich, S. Nemšák, J. T. Mefford and W. C. Chueh, *Nat. Mater.*, 2021, **20**, 674-682.
